# Supplementary material
Source: ML conference proceedings conference paper supplement (https://openreview.net/forum?id=ofioIEZvJRG)

Attention weights

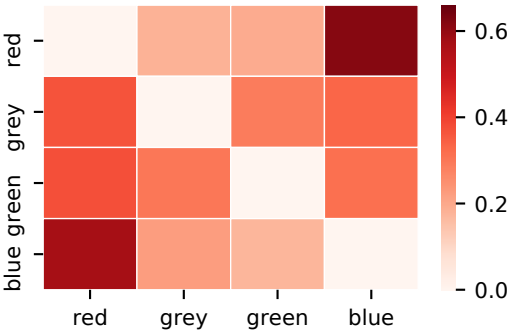

Attention weights, velocity = 0

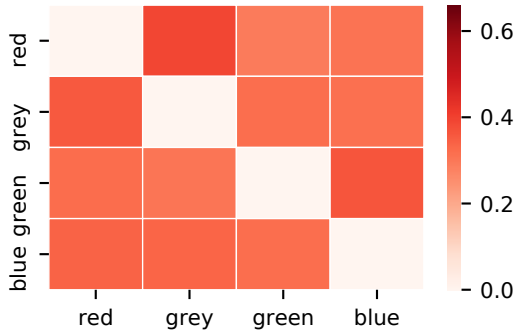

Supplement: supplementary_material [file attachment]
